# Supplementary material for: Bioactive Cembrane-Based Diterpenoids from the Soft Coral Sinularia triangular
Source: MDPI journal article supplement (doi:10.3390/md9060944), 2011-05-27
Supplement: s1 [file s1]

# Supporting Information

## Bioactive Cembrane-Based Diterpenoids from the Soft Coral *Sinularia triangular*

Jui-Hsin Su\* and Zhi-Hong Wen

### Table of Contents

- S1. Table of Contents
- S2.  $^1\text{H}$  NMR spectrum of **1** in  $\text{CDCl}_3$  at 400 MHz.
- S3.  $^{13}\text{C}$  NMR spectrum of **1** in  $\text{CDCl}_3$  at 100 MHz.
- S4. HMQC spectrum of **1** in  $\text{CDCl}_3$ .
- S5. HMBC-1 spectrum of **1** in  $\text{CDCl}_3$ .
- S6. HMBC-2 spectrum of **1** in  $\text{CDCl}_3$ .
- S7.  $^1\text{H}$ - $^1\text{H}$  COSY spectrum of **1** in  $\text{CDCl}_3$ .

S1.

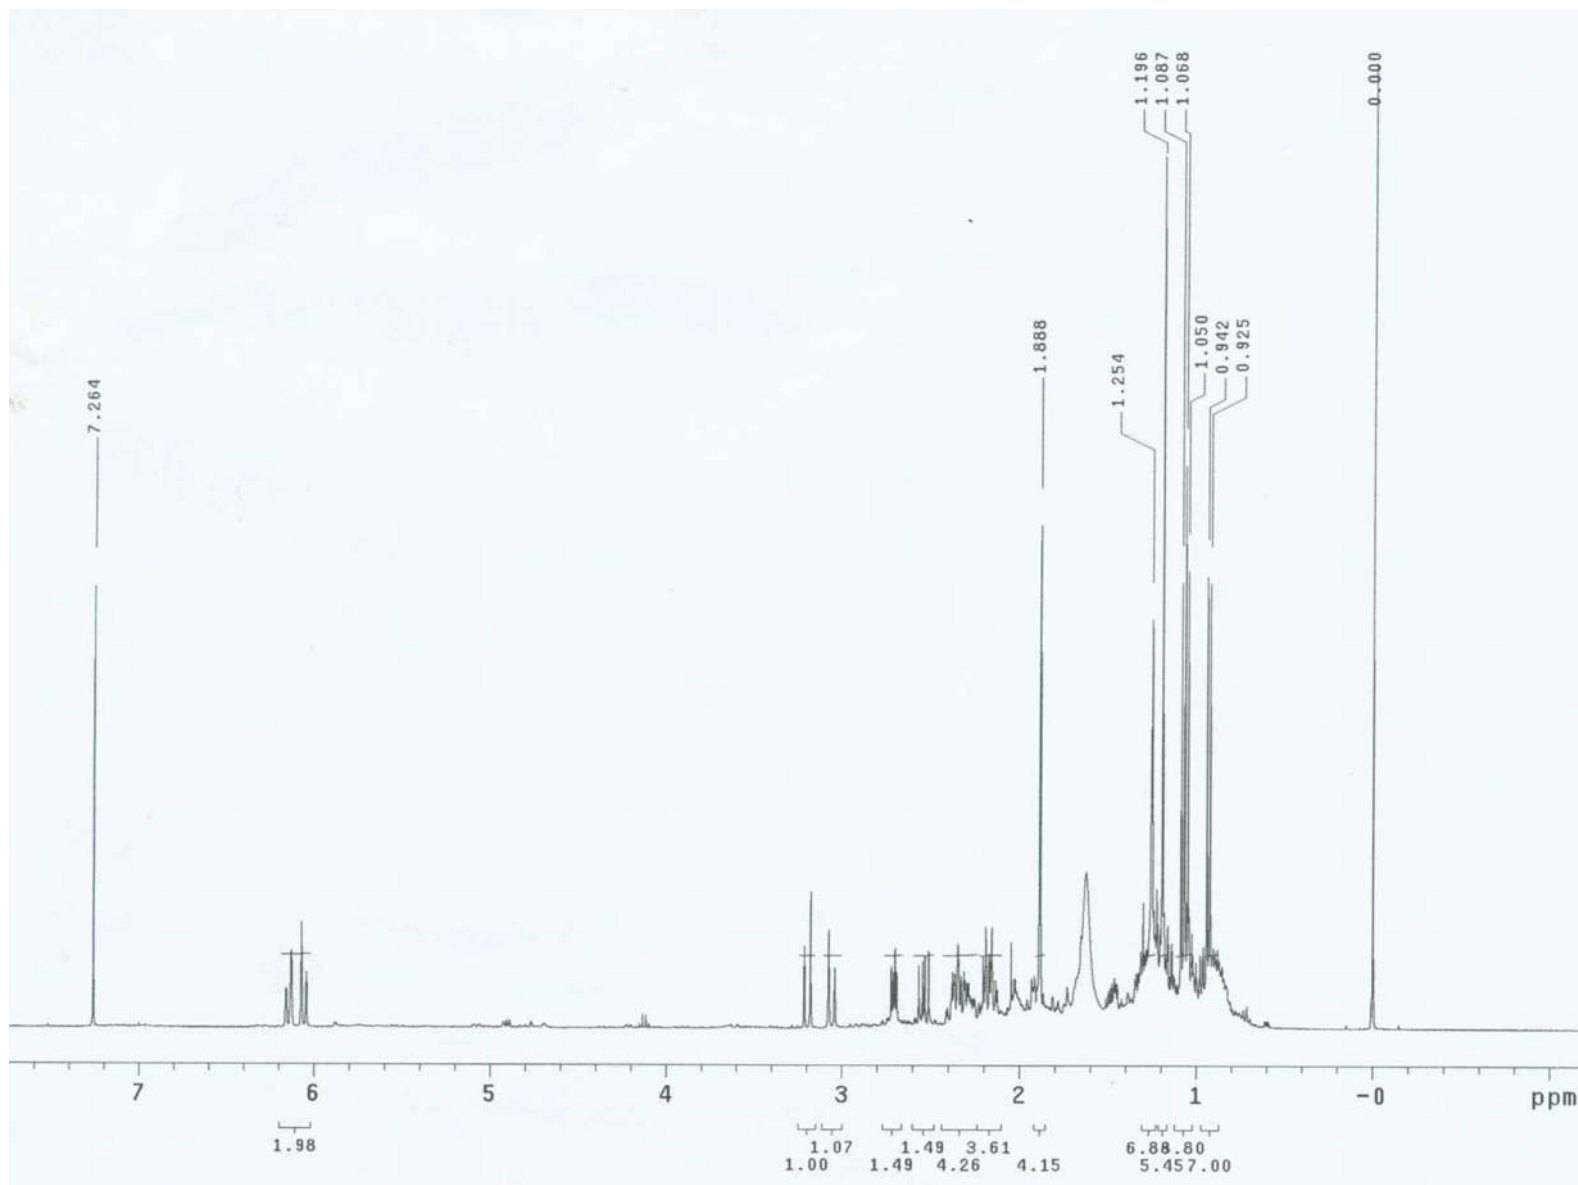

S2.  $^1\text{H}$  NMR spectrum of **1** in  $\text{CDCl}_3$  at 400 MHz.

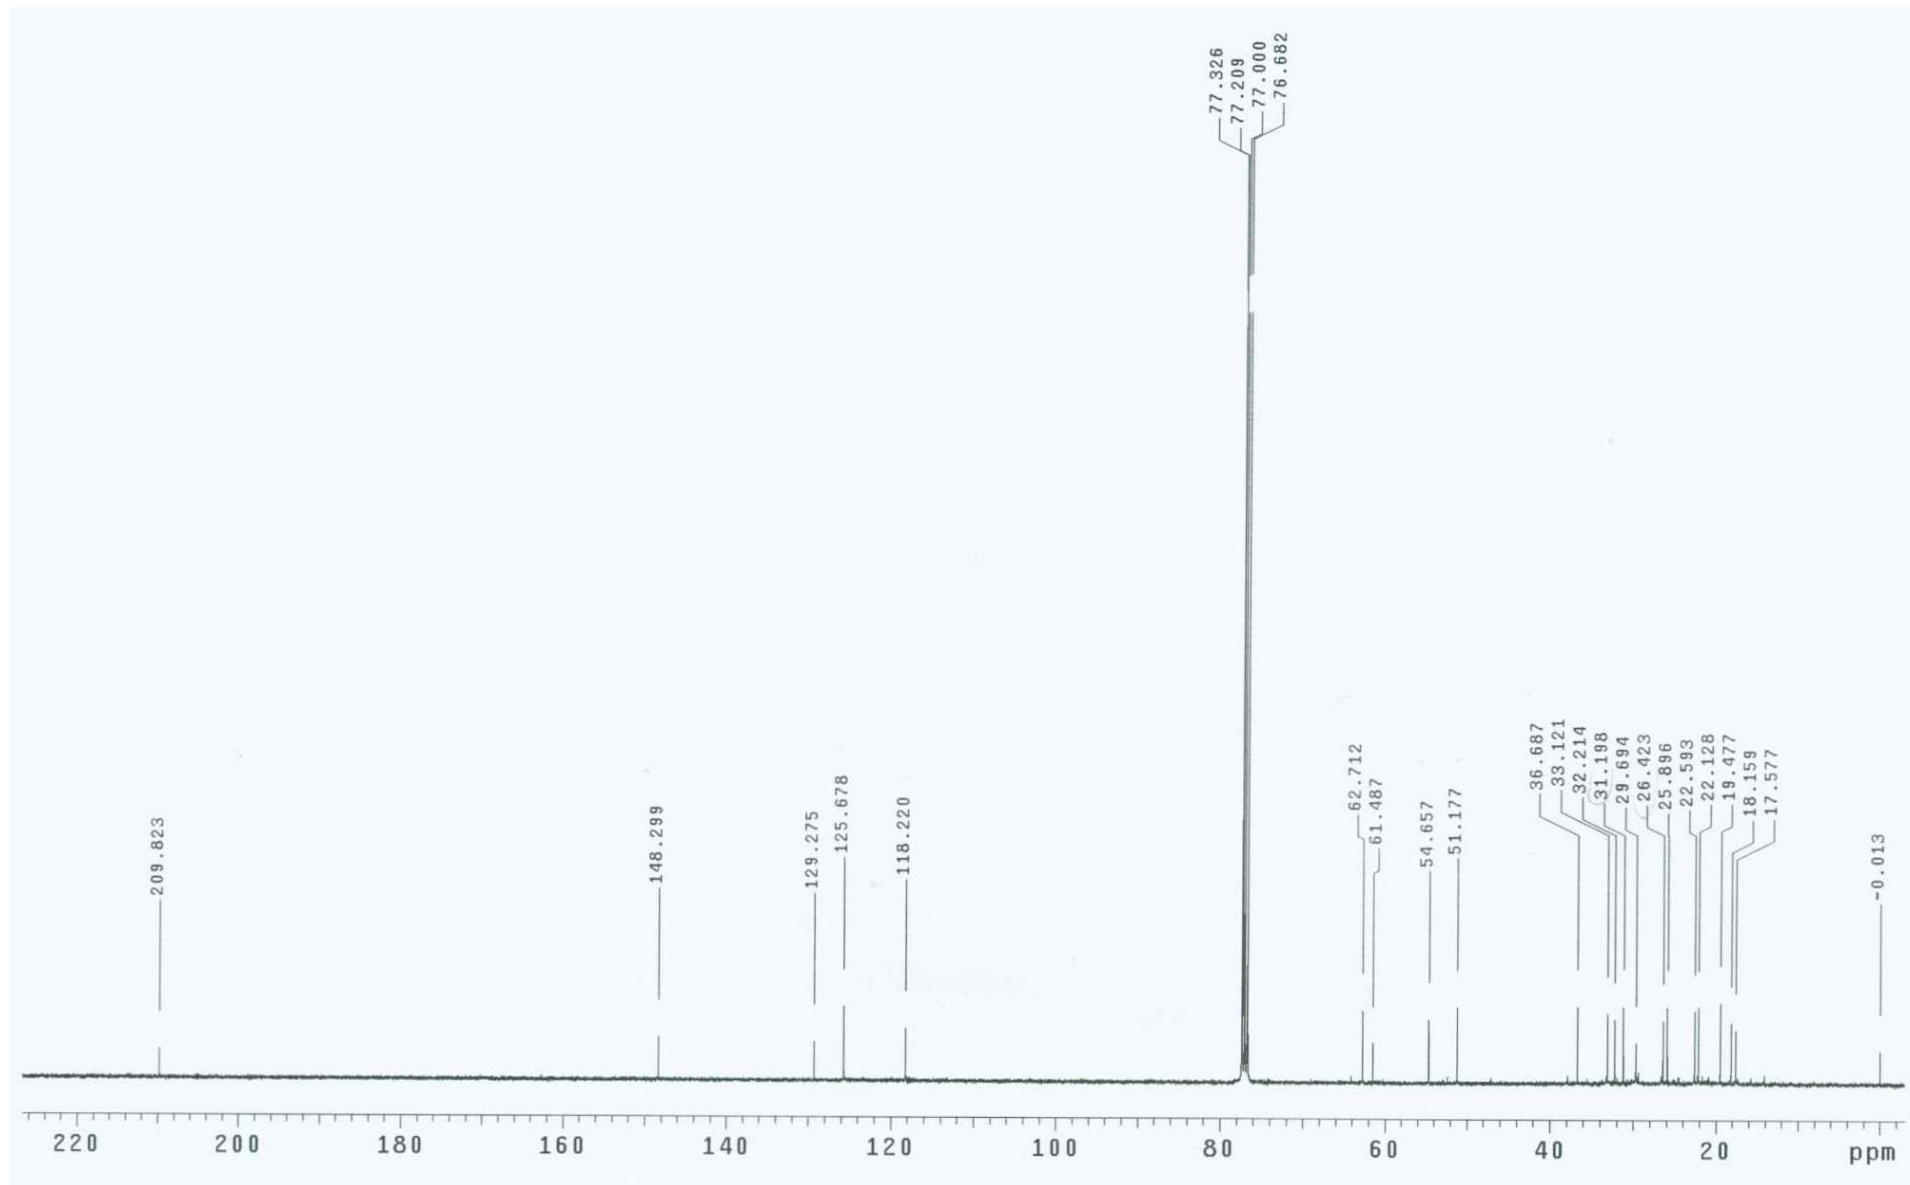

**S3.**  $^{13}\text{C}$  NMR spectrum of **1** in  $\text{CDCl}_3$  at 100 MHz.

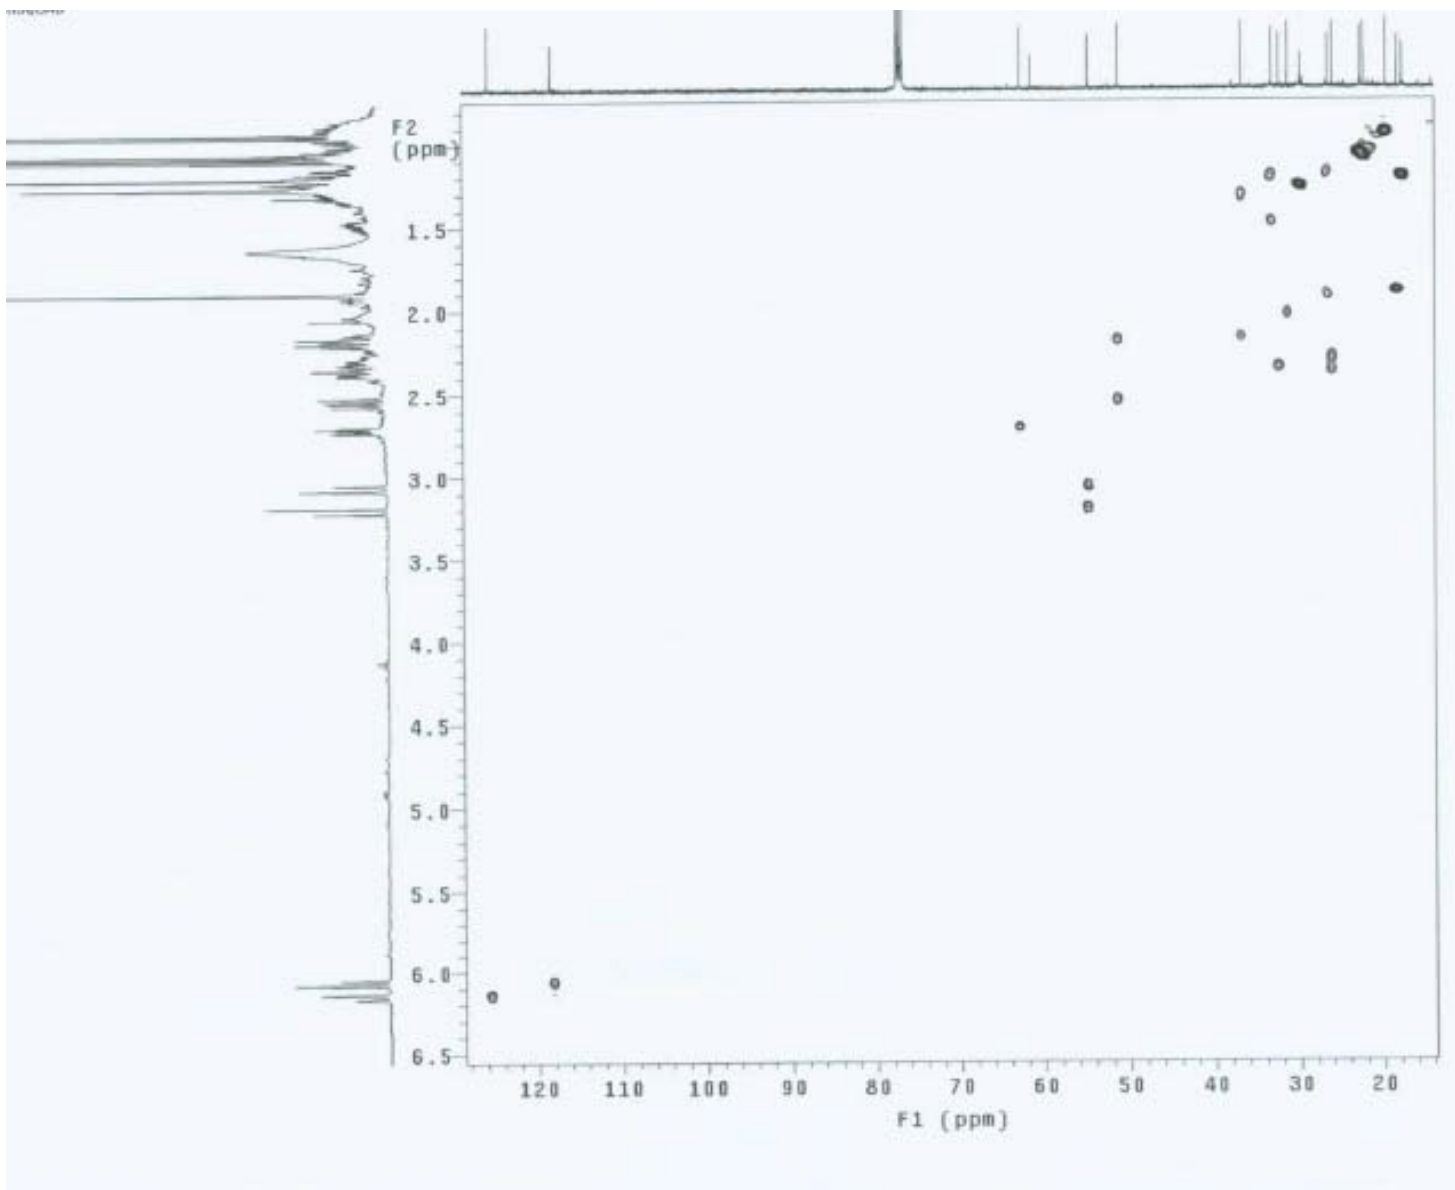

**S4.** HMQC spectrum of **1** in  $\text{CDCl}_3$ .

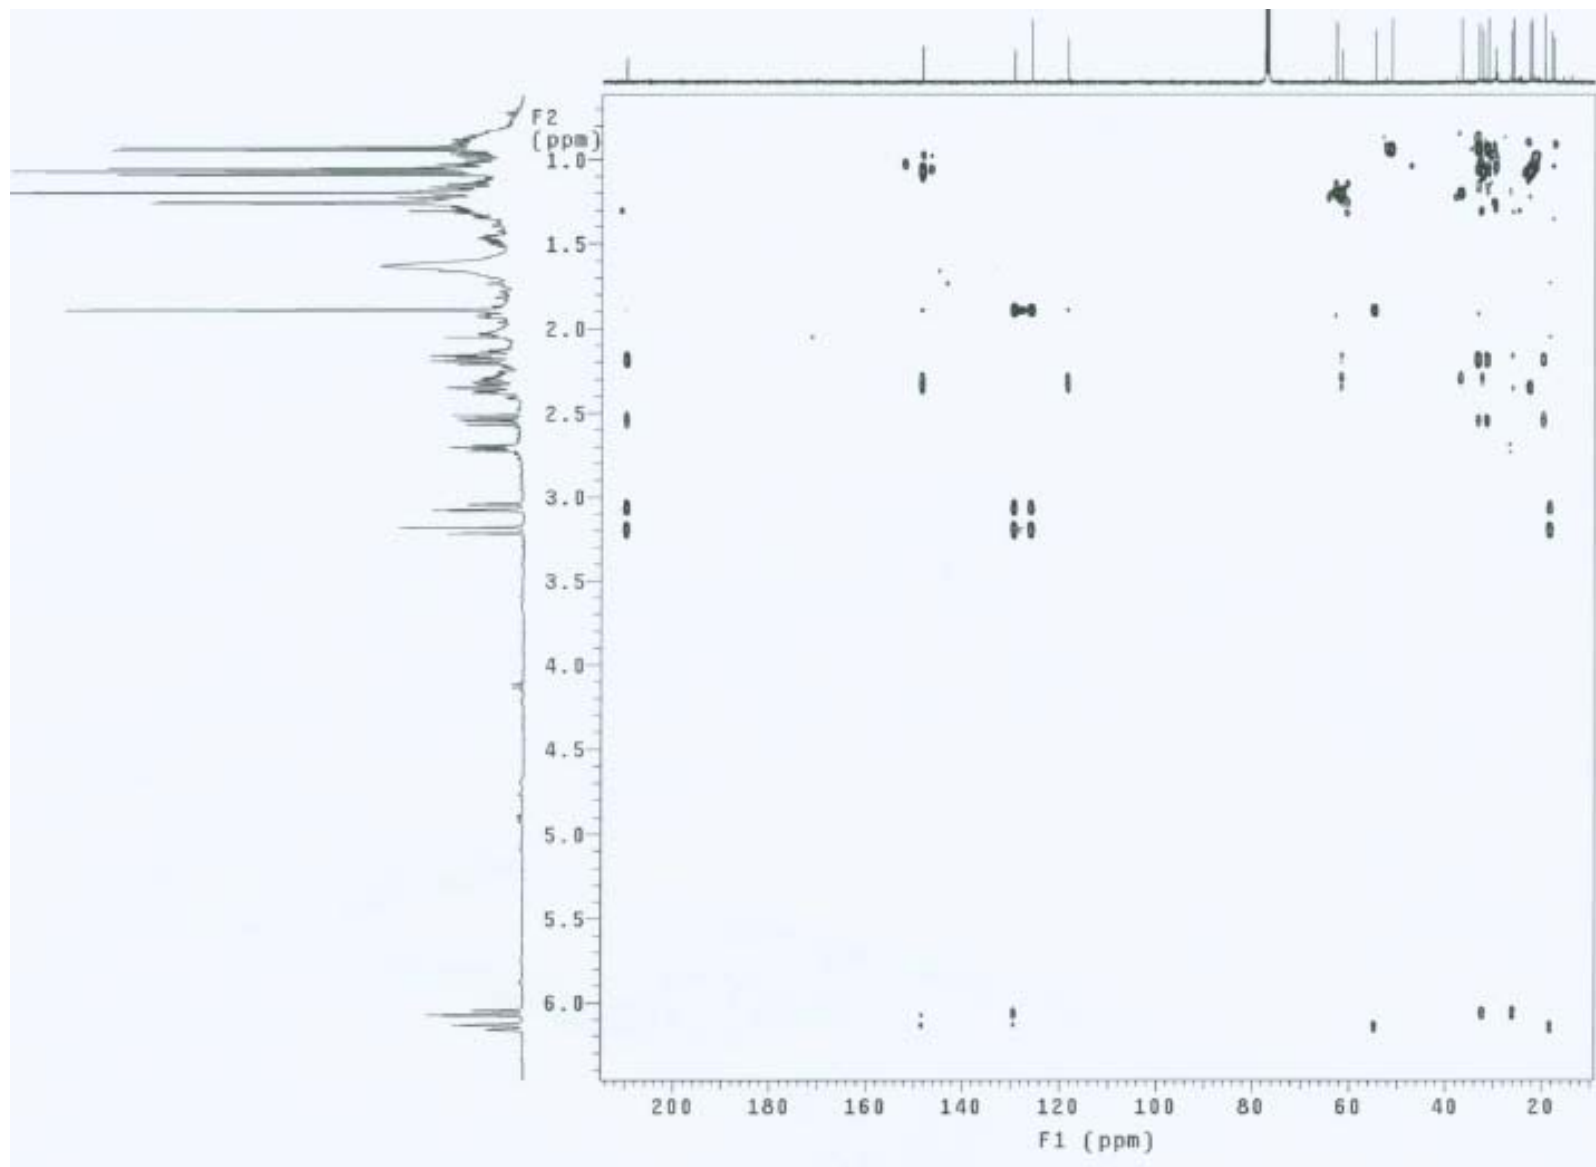

**S5.** HMBC-1 spectrum of **1** in CDCl<sub>3</sub>

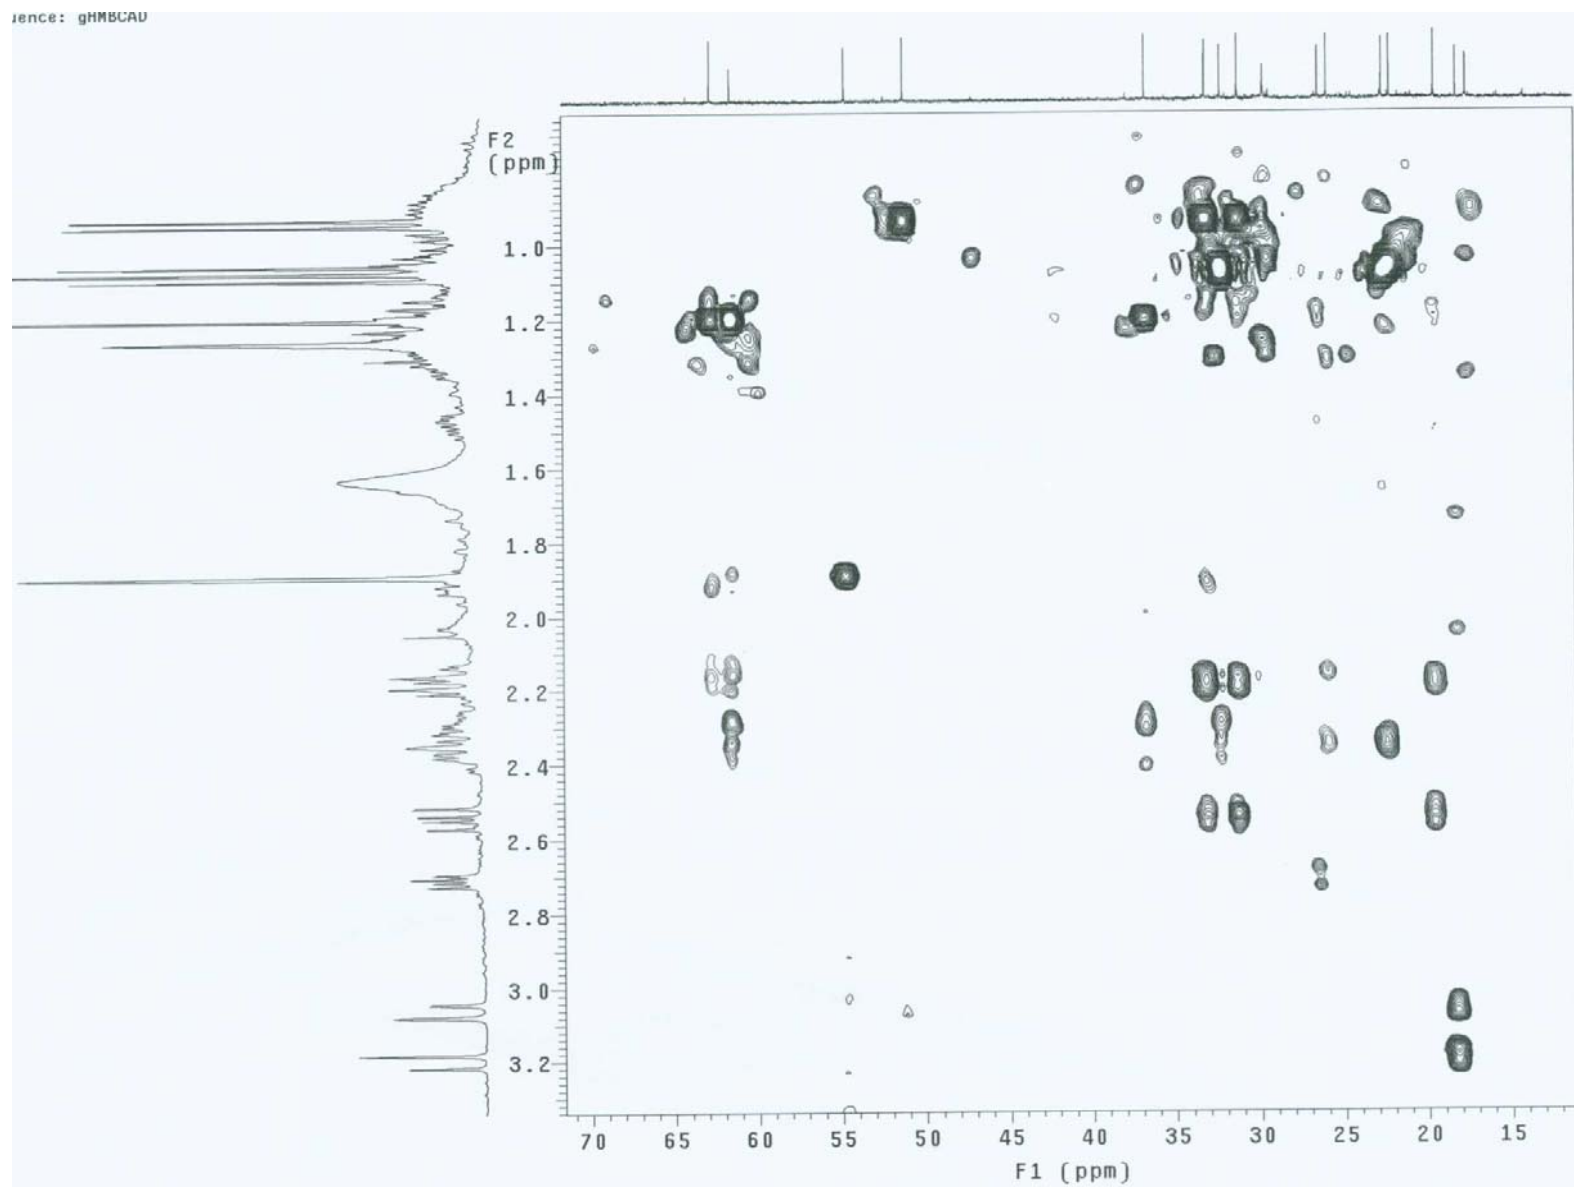

**S6.** HMBC-2 spectrum of **1** in  $\text{CDCl}_3$

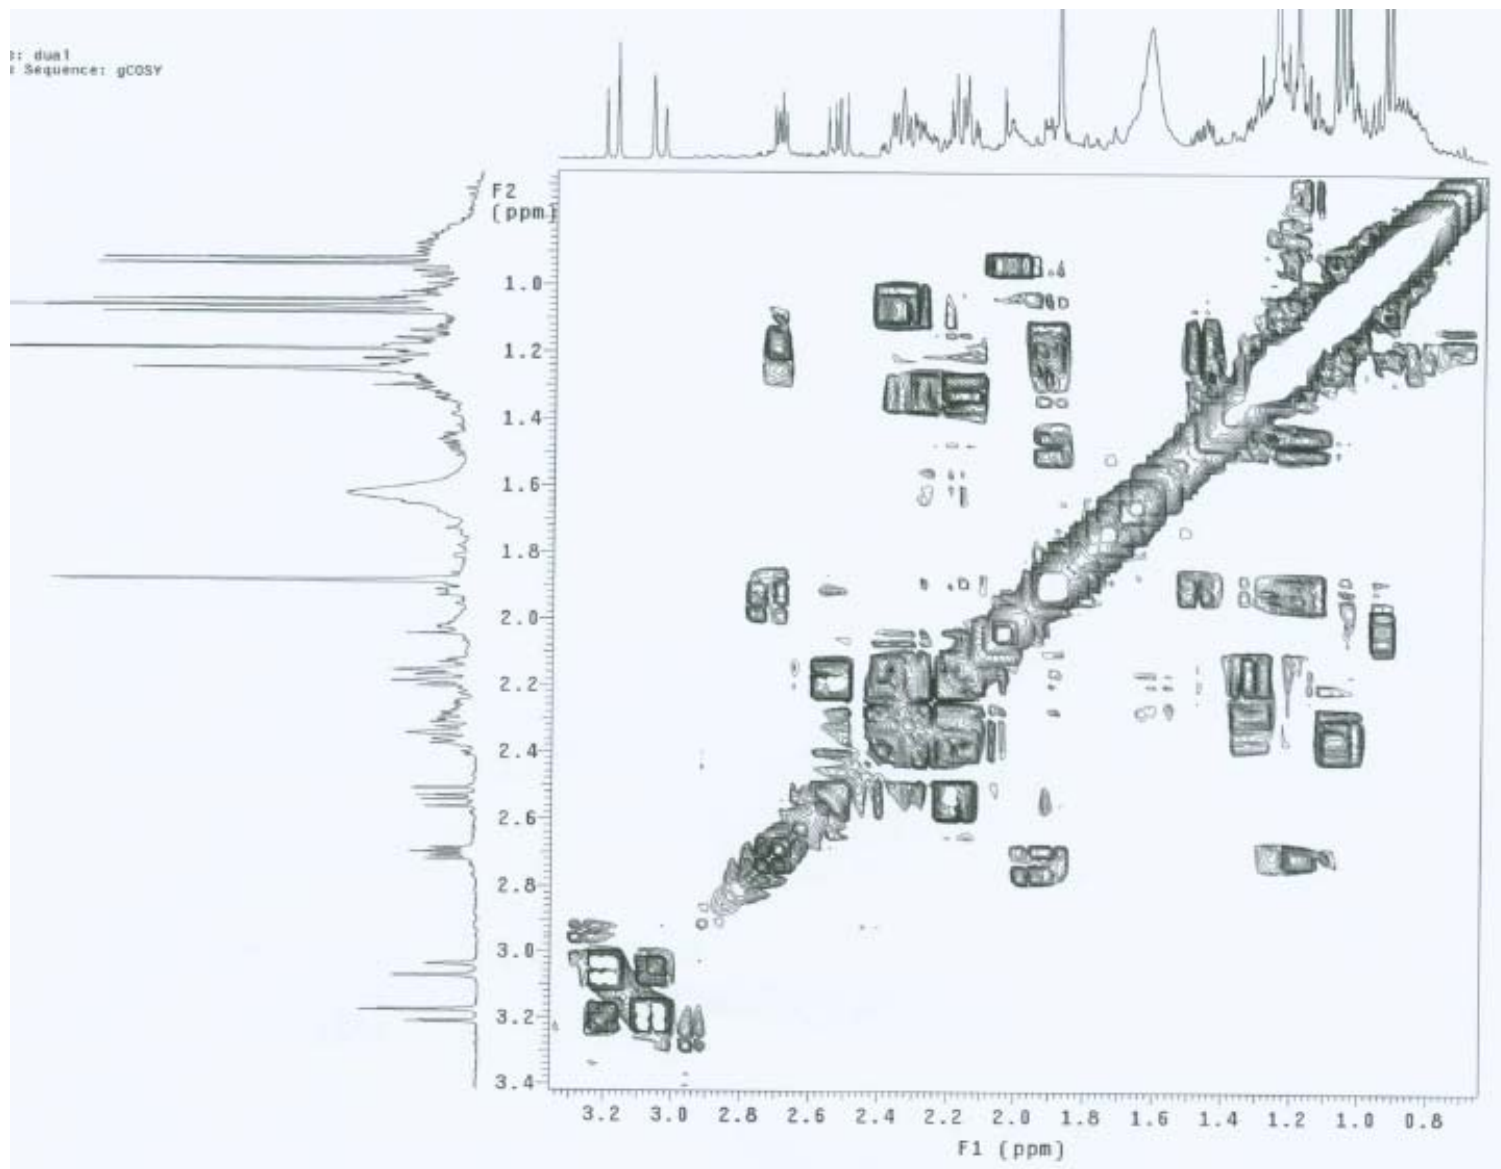

S7.  $^1\text{H}$ - $^1\text{H}$  COSY spectrum of **1** in  $\text{CDCl}_3$ .
